# Supplementary material
Source: PubMed Central journal article supplement (PMC6170408)
Supplement: 41422_2018_71_MOESM1_ESM.pdf [file 41422_2018_71_MOESM1_ESM.pdf]

## Supplementary information, Figure S1

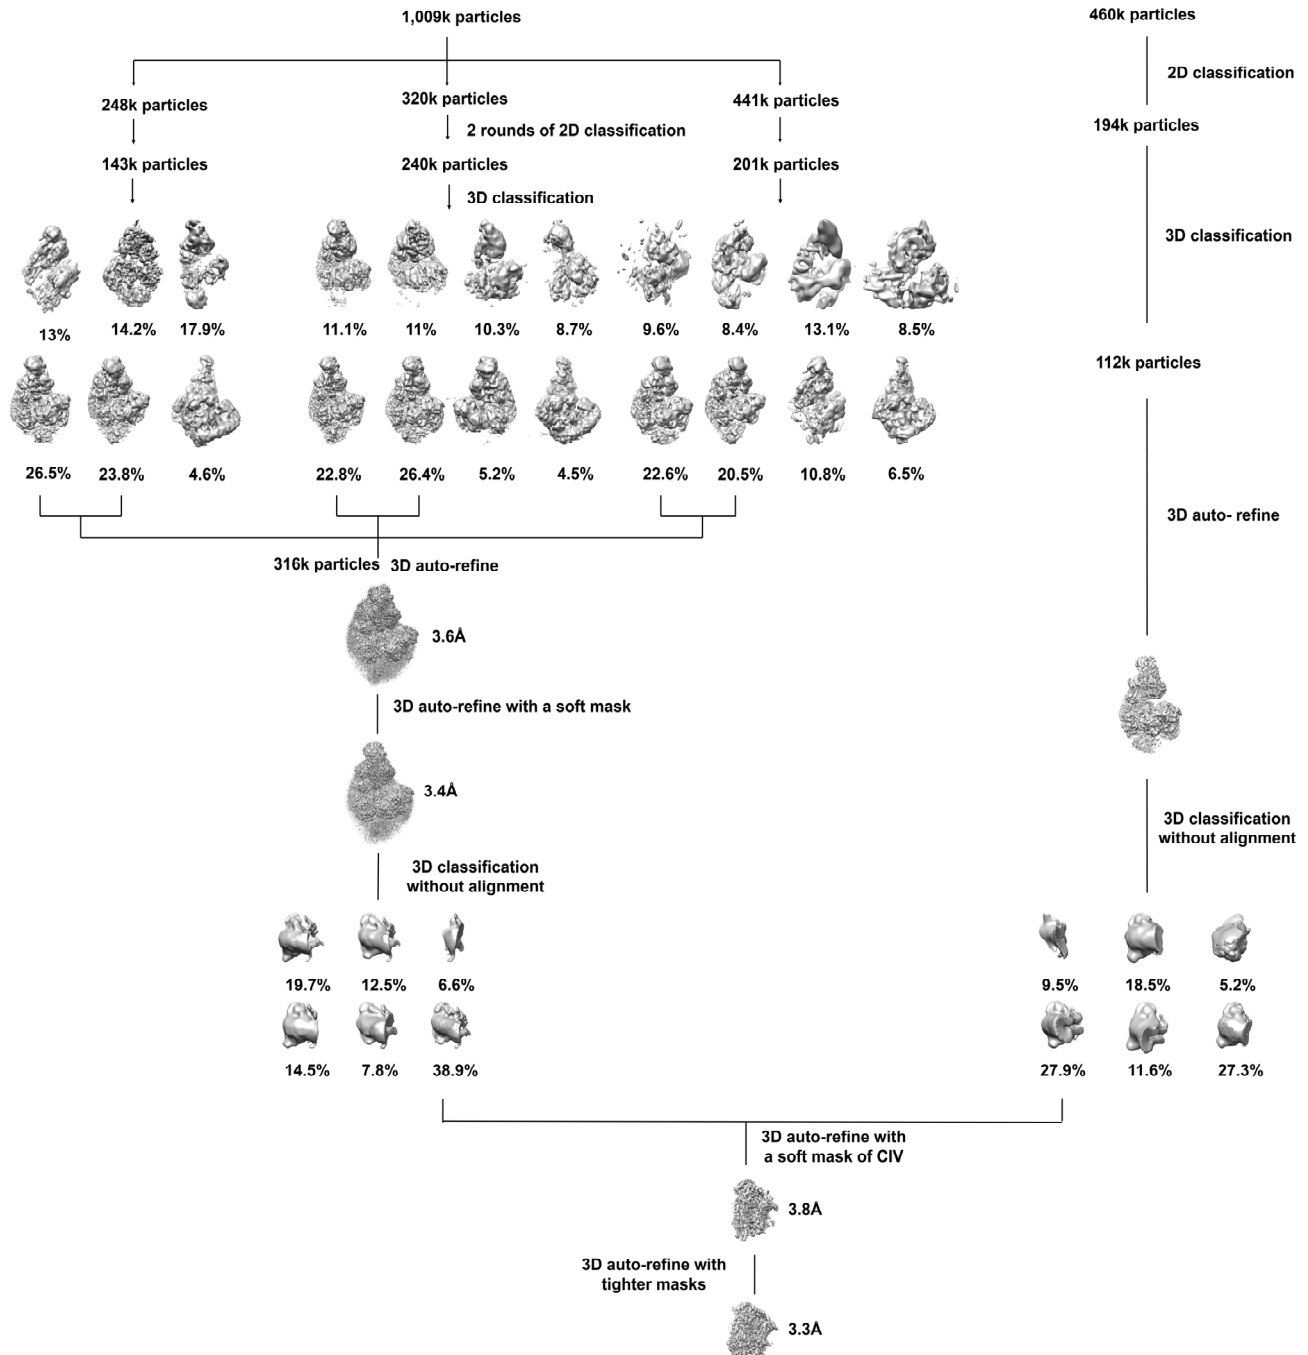

**Figure S1. Workflow of 3D Reconstruction with Cryo-EM Data**

In the calculation of the human CIV, we totally obtained about 1,470,000 particles and 428,000 particles were kept after 2D and 3D classification. A final dataset containing about 154,000 particles were used for high-resolution refinement and soft masks refinement to obtain the final 3.3 Å CIV density map.
