# Supplementary material
Source: PubMed Central journal article supplement (PMC6170408)
Supplement: 41422_2018_71_MOESM2_ESM.pdf [file 41422_2018_71_MOESM2_ESM.pdf]

## Supplementary information, Figure S2

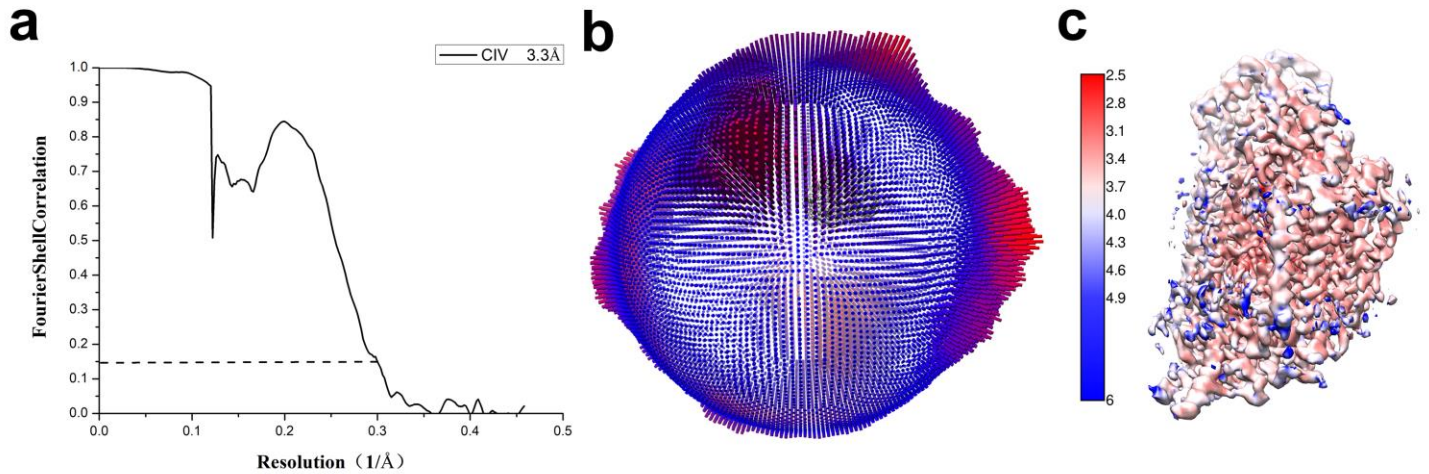

**Figure S2. Statistics of the Final Density Maps after Soft Mask Refinement**

(a) Gold-standard Fourier Shell Correlation (FSC) curve of the final density maps, after correction of the soft mask-induced effects. The final resolution of CIV is 3.3 Å. (b) Particle orientation distributions in the last iteration of the structural refinement. Red cylinders mean more particles on these orientations. Heights of cylinders represent the relative numbers of particles. (c) Local resolution map of the final 3D density map of CIV. Viewed along the inner membrane side.
