# Supplementary material
Source: PubMed Central journal article supplement (PMC6170408)
Supplement: 41422_2018_71_MOESM3_ESM.pdf [file 41422_2018_71_MOESM3_ESM.pdf]

## Supplementary information, Figure S3

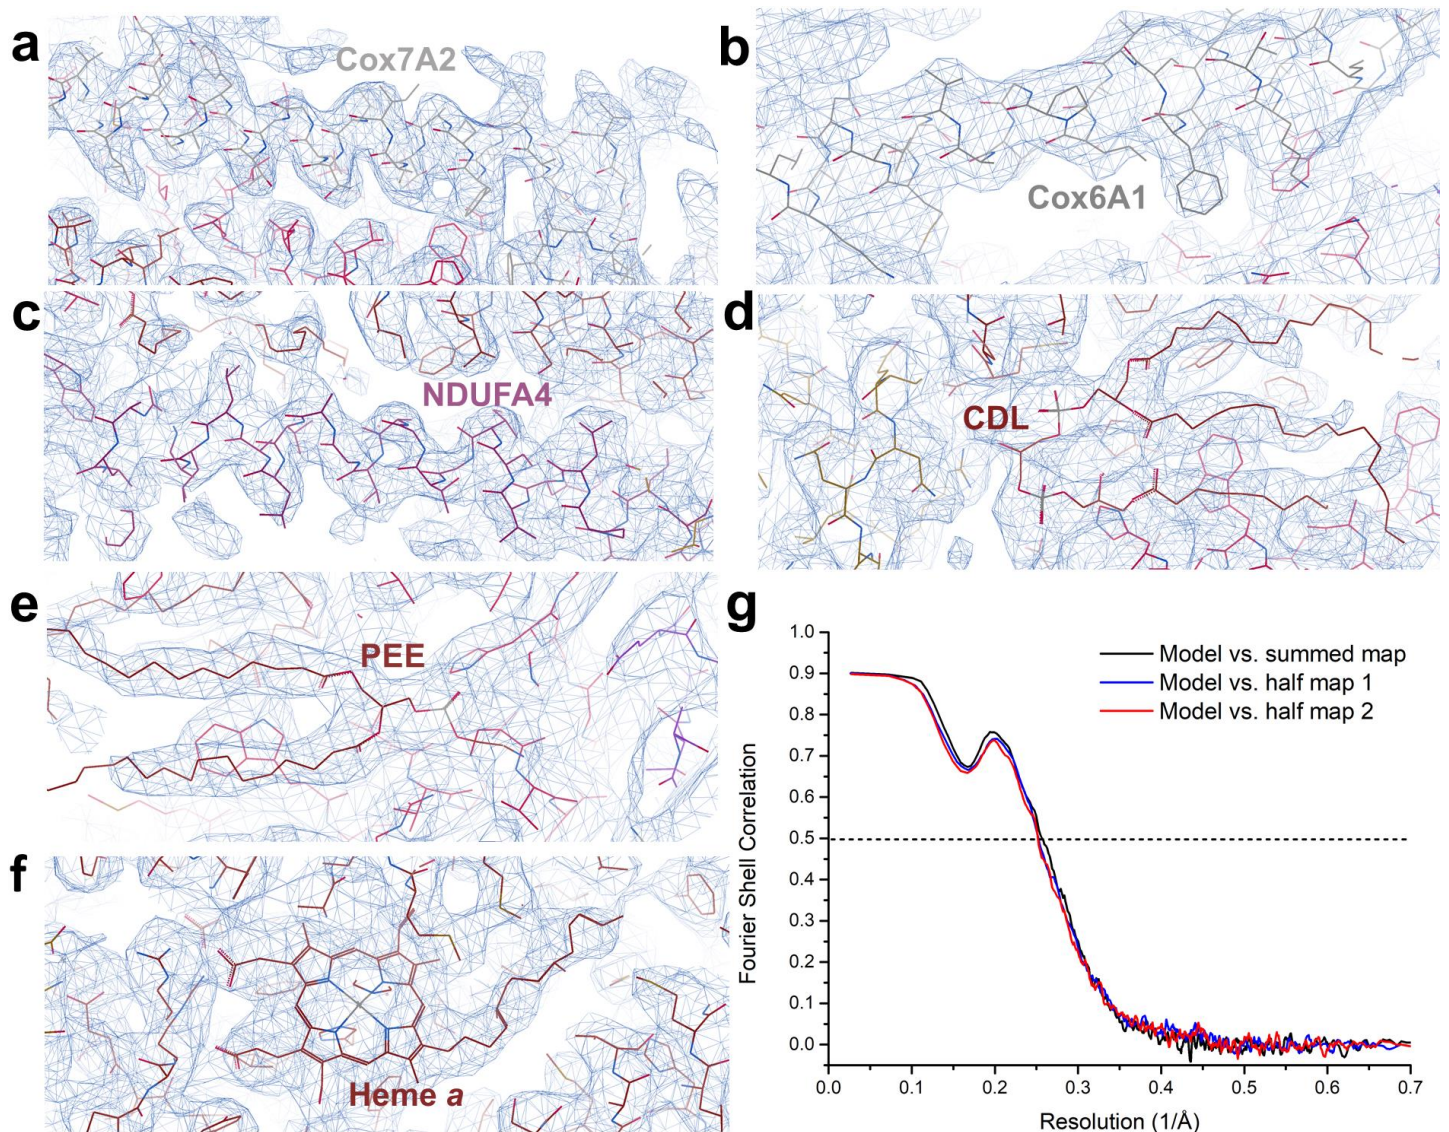

**Figure S3. Cryo-EM Density for Different Sub-regions and Model Validation**

(a) Representative Cryo-EM densities of Cox7A2 is displayed at rmsd = 10 contour level. (b) Representative Cryo-EM densities of Cox6A1 is displayed at rmsd = 10 contour level. (c) Representative Cryo-EM densities of NDUFA4 is displayed at rmsd = 10 contour level. (d) Representative Cryo-EM densities of cardiolipin molecule is displayed at rmsd = 10 contour level. (e) Representative Cryo-EM densities of phosphatidylethanolamine molecule is displayed at rmsd = 10 contour level. (f) Representative Cryo-EM densities of heme-A is displayed at rmsd = 10 contour level. (g) Cross-validation of CIV with the use of map and model. Blue line, FSC curve of model Test (see methods for more details) against first of the two independent maps generated by RELION 3D auto-refine procedure. Red line, FSC curve of model Test against second of the two independent maps. Black line, FSC curve of final model against the summed map generated by RELION 3D auto-refine procedure.
