# Supplementary material
Source: PubMed Central journal article supplement (PMC6170408)
Supplement: 41422_2018_71_MOESM4_ESM.pdf [file 41422_2018_71_MOESM4_ESM.pdf]

## Supplementary information, Figure S4

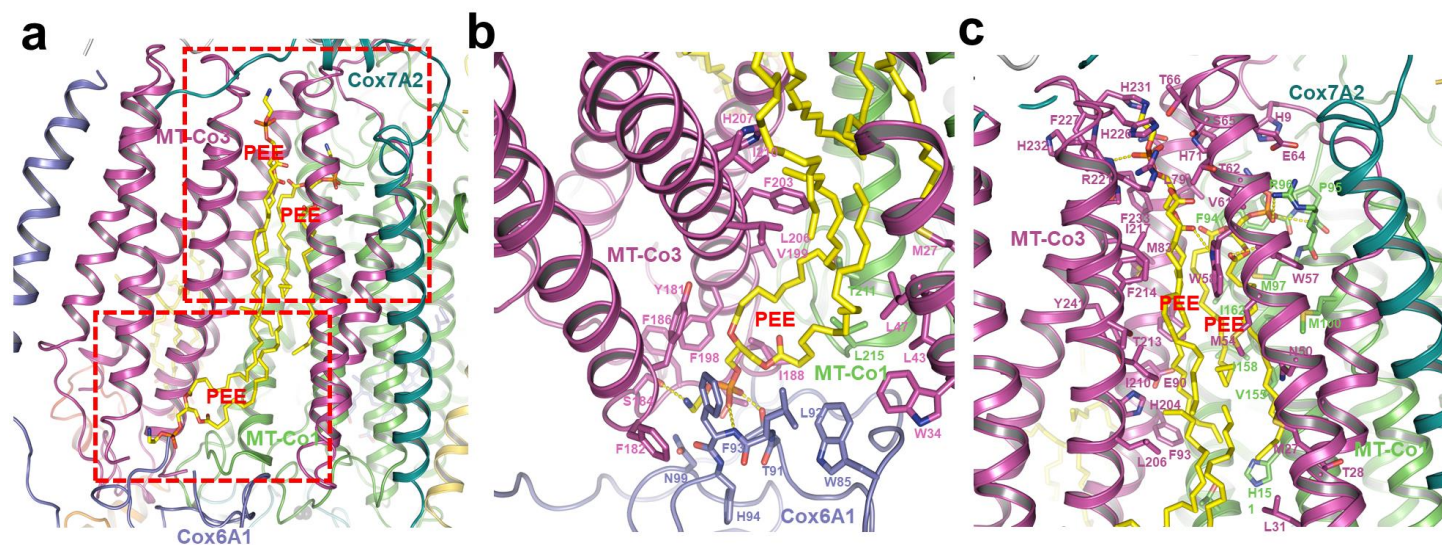

**Figure S4. The Phosphatidylethanolamine Molecules in Human CIV**

(a) The phosphatidylethanolamine molecules in the CIV monomer. The phosphatidylethanolamine molecules are shown in yellow sticks. Subunits directly involved in phosphatidylethanolamine binding are labeled and shown in cartoon. Two different regions are labeled in the red dashed frames. (b) The phosphatidylethanolamine molecule of the lower red dashed frame in (a). This panel is shown in the same way as (a). (c) The phosphatidylethanolamine molecule of the upper red dashed frame in (a). This panel is shown in the same way as (a).
