# Supplementary material
Source: PubMed Central journal article supplement (PMC6170408)
Supplement: 41422_2018_71_MOESM5_ESM.pdf [file 41422_2018_71_MOESM5_ESM.pdf]

## Supplementary information, Figure S5

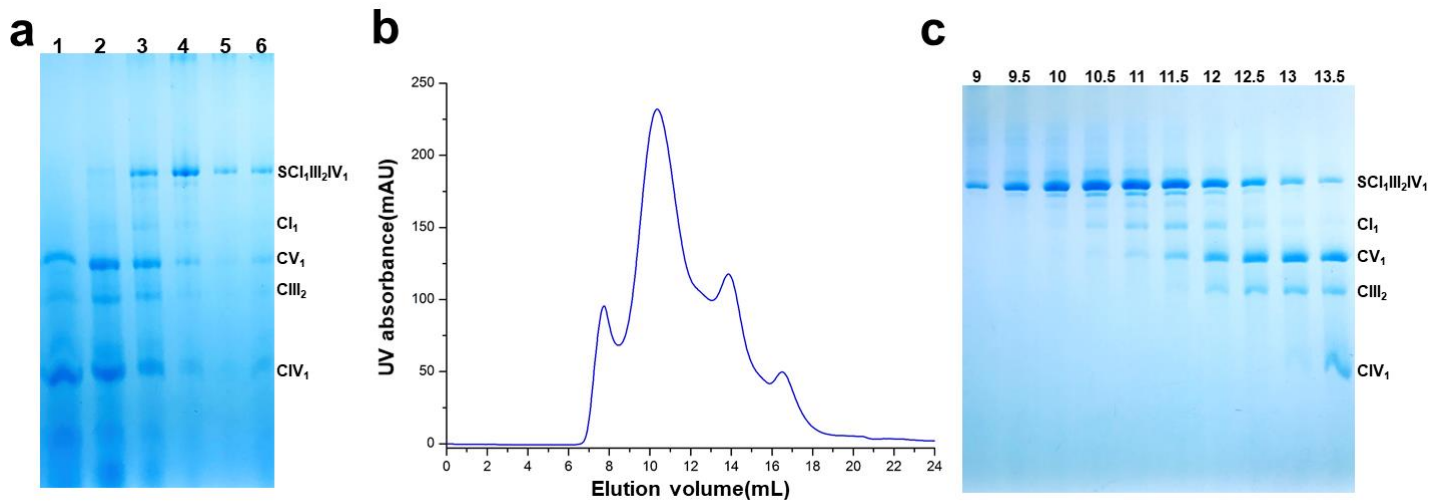

**Figure S5. Biochemical Characterization of Monomeric CIV**

(a) Fractions of sucrose gradient ultracentrifugation were analysed by BN-PAGE. (b) Representative trace of size-exclusion chromatography by the superpose 6 increase (10/300 GL) column of CIV and other respiratory complexes. (c) Protein samples of the size-exclusion chromatography fractions were subjected to BN-PAGE.
