# Supplementary material
Source: PubMed Central journal article supplement (PMC6170408)
Supplement: 41422_2018_71_MOESM6_ESM.pdf [file 41422_2018_71_MOESM6_ESM.pdf]

Table S1. Polymeric and NDUFA4 state in published mammalian complex IV structures, Related to Figure 6

| Species           | PDB ID | Method | Resolution (Å) | Polymeric State | NDUFA4 State | Reference                                                                                                                                                                                                                                                                                                                                 |
|-------------------|--------|--------|----------------|-----------------|--------------|-------------------------------------------------------------------------------------------------------------------------------------------------------------------------------------------------------------------------------------------------------------------------------------------------------------------------------------------|
| <i>Bos taurus</i> | 1OCC   | X-ray  | 2.8            | dimer           | missing      | Tsukihara, T., Aoyama, H., Yamashita, E., Tomizaki, T., Yamaguchi, H., Shinzawa-Itoh, K., Nakashima, R., Yaono, R., Yoshikawa, S. (1996) The whole structure of the 13-subunit oxidized cytochrome c oxidase at 2.8 Å. <i>Science</i> 272: 1136-1144                                                                                      |
| <i>Bos taurus</i> | 1OCO   | X-ray  | 2.8            | dimer           | missing      | Yoshikawa, S., Shinzawa-Itoh, K., Nakashima, R., Yaono, R., Yamashita, E., Inoue, N., Yao, M., Fei, M.J., Libeu, C.P., Mizushima, T., Yamaguchi, H., Tomizaki, T., Tsukihara, T. (1998) Redox-coupled crystal structural changes in bovine heart cytochrome c oxidase. <i>Science</i> 280: 1723-1729                                      |
| <i>Bos taurus</i> | 1OCR   | X-ray  | 2.35           | dimer           | missing      | Yoshikawa, S., Shinzawa-Itoh, K., Nakashima, R., Yaono, R., Yamashita, E., Inoue, N., Yao, M., Fei, M.J., Libeu, C.P., Mizushima, T., Yamaguchi, H., Tomizaki, T., Tsukihara, T. (1998) Redox-coupled crystal structural changes in bovine heart cytochrome c oxidase. <i>Science</i> 280: 1723-1729                                      |
| <i>Bos taurus</i> | 1OCZ   | X-ray  | 2.9            | dimer           | missing      | Yoshikawa, S., Shinzawa-Itoh, K., Nakashima, R., Yaono, R., Yamashita, E., Inoue, N., Yao, M., Fei, M.J., Libeu, C.P., Mizushima, T., Yamaguchi, H., Tomizaki, T., Tsukihara, T. (1998) Redox-coupled crystal structural changes in bovine heart cytochrome c oxidase. <i>Science</i> 280: 1723-1729                                      |
| <i>Bos taurus</i> | 1V54   | X-ray  | 1.8            | dimer           | missing      | Tsukihara, T., Shimokata, K., Katayama, Y., Shimada, H., Muramoto, K., Aoyama, H., Mochizuki, M., Shinzawa-Itoh, K., Yamashita, E., Yao, M., Ishimura, Y., Yoshikawa, S. (2003) The low-spin heme of cytochrome c oxidase as the driving element of the proton-pumping process. <i>Proc.Natl.Acad.Sci.Usa</i> 100: 15304-15309            |
| <i>Bos taurus</i> | 1V55   | X-ray  | 1.9            | dimer           | missing      | Tsukihara, T., Shimokata, K., Katayama, Y., Shimada, H., Muramoto, K., Aoyama, H., Mochizuki, M., Shinzawa-Itoh, K., Yamashita, E., Yao, M., Ishimura, Y., Yoshikawa, S. (2003) The low-spin heme of cytochrome c oxidase as the driving element of the proton-pumping process. <i>Proc.Natl.Acad.Sci.Usa</i> 100: 15304-15309            |
| <i>Bos taurus</i> | 2DYR   | X-ray  | 1.8            | dimer           | missing      | Shinzawa-Itoh, K., Aoyama, H., Muramoto, K., Terada, H., Kurauchi, T., Tadehara, Y., Yamasaki, A., Sugimura, T., Kurono, S., Tsujimoto, K., Mizushima, T., Yamashita, E., Tsukihara, T., Yoshikawa, S. (2007) Structures and physiological roles of 13 integral lipids of bovine heart cytochrome c oxidase. <i>Embo J.</i> 26: 1713-1725 |
| <i>Bos taurus</i> | 2DYS   | X-ray  | 2.2            | dimer           | missing      | Shinzawa-Itoh, K., Aoyama, H., Muramoto, K., Terada, H., Kurauchi, T., Tadehara, Y., Yamasaki, A., Sugimura, T., Kurono, S., Tsujimoto, K., Mizushima, T., Yamashita, E., Tsukihara, T., Yoshikawa, S. (2007) Structures and physiological roles of 13 integral lipids of bovine heart cytochrome c oxidase. <i>Embo J.</i> 26: 1713-1725 |
| <i>Bos taurus</i> | 2EIJ   | X-ray  | 1.9            | dimer           | missing      | Muramoto, K., Hirata, K., Shinzawa-Itoh, K., Yoko-o, S., Yamashita, E., Aoyama, H., Tsukihara, T., Yoshikawa, S. (2007) A histidine residue acting as a controlling site for dioxygen reduction and proton pumping by cytochrome c oxidase. <i>Proc.Natl.Acad.Sci.Usa</i> 104: 7881-7886                                                  |
| <i>Bos taurus</i> | 2EIK   | X-ray  | 2.1            | dimer           | missing      | Muramoto, K., Hirata, K., Shinzawa-Itoh, K., Yoko-o, S., Yamashita, E., Aoyama, H., Tsukihara, T., Yoshikawa, S. (2007) A histidine residue acting as a controlling site for dioxygen reduction and proton pumping by cytochrome c oxidase. <i>Proc.Natl.Acad.Sci.Usa</i> 104: 7881-7886                                                  |
| <i>Bos taurus</i> | 2EIL   | X-ray  | 2.1            | dimer           | missing      | Muramoto, K., Hirata, K., Shinzawa-Itoh, K., Yoko-o, S., Yamashita, E., Aoyama, H., Tsukihara, T., Yoshikawa, S. (2007) A histidine residue acting as a controlling site for dioxygen reduction and proton pumping by cytochrome c oxidase. <i>Proc.Natl.Acad.Sci.Usa</i> 104: 7881-7886                                                  |
| <i>Bos taurus</i> | 2EIM   | X-ray  | 2.6            | dimer           | missing      | Muramoto, K., Hirata, K., Shinzawa-Itoh, K., Yoko-o, S., Yamashita, E., Aoyama, H., Tsukihara, T., Yoshikawa, S. (2007) A histidine residue acting as a controlling site for dioxygen reduction and proton pumping by cytochrome c oxidase. <i>Proc.Natl.Acad.Sci.Usa</i> 104: 7881-7886                                                  |
| <i>Bos taurus</i> | 2EIN   | X-ray  | 2.7            | dimer           | missing      | Muramoto, K., Hirata, K., Shinzawa-Itoh, K., Yoko-o, S., Yamashita, E., Aoyama, H., Tsukihara, T., Yoshikawa, S. (2007) A histidine residue acting as a controlling site for dioxygen reduction and proton pumping by cytochrome c oxidase. <i>Proc.Natl.Acad.Sci.Usa</i> 104: 7881-7886                                                  |

|                   |      |       |      |       |         |                                                                                                                                                                                                                                                                                                                                                                                                                                                 |
|-------------------|------|-------|------|-------|---------|-------------------------------------------------------------------------------------------------------------------------------------------------------------------------------------------------------------------------------------------------------------------------------------------------------------------------------------------------------------------------------------------------------------------------------------------------|
| <i>Bos taurus</i> | 2OCC | X-ray | 2.3  | dimer | missing | Yoshikawa, S., Shinzawa-Itoh, K., Nakashima, R., Yaono, R., Yamashita, E., Inoue, N., Yao, M., Fei, M.J., Libeu, C.P., Mizushima, T., Yamaguchi, H., Tomizaki, T., Tsukihara, T (1998). Redox-coupled crystal structural changes in bovine heart cytochrome c oxidase. <i>Science</i> 280: 1723-1729                                                                                                                                            |
| <i>Bos taurus</i> | 2Y69 | X-ray | 1.95 | dimer | missing | Kaila, V.R.I., Oksanen, E., Goldman, A., Bloch, D.A., Verkhovsky, M.I., Sundholm, D., Wikstrom, M. (2011) A Combined Quantum Chemical and Crystallographic Study on the Oxidized Binuclear Center of Cytochrome C Oxidase. <i>Biochim.Biophys.Acta</i> 1807: 769                                                                                                                                                                                |
| <i>Bos taurus</i> | 2ZXW | X-ray | 2.5  | dimer | missing | Aoyama, H., Muramoto, K., Shinzawa-Itoh, K., Hirata, K., Yamashita, E., Tsukihara, T., Ogura, T., Yoshikawa, S. (2009) A peroxide bridge between Fe and Cu ions in the O2 reduction site of fully oxidized cytochrome c oxidase could suppress the proton pump. <i>Proc.Natl.Acad.Sci.USA</i> 106: 2165-2169                                                                                                                                    |
| <i>Bos taurus</i> | 3ABK | X-ray | 2.0  | dimer | missing | Ohta, K., Muramoto, K., Shinzawa-Itoh, K., Yamashita, E., Yoshikawa, S., Tsukihara, T. (2010) X-ray structure of the NO-bound Cu(B) in bovine cytochrome c oxidase. <i>Acta Crystallogr.,Sect.F</i> 66: 251-253                                                                                                                                                                                                                                 |
| <i>Bos taurus</i> | 3ABL | X-ray | 2.1  | dimer | missing | Aoyama, H., Muramoto, K., Shinzawa-Itoh, K., Hirata, K., Yamashita, E., Tsukihara, T., Ogura, T., Yoshikawa, S. (2009) A peroxide bridge between Fe and Cu ions in the O2 reduction site of fully oxidized cytochrome c oxidase could suppress the proton pump. <i>Proc.Natl.Acad.Sci.USA</i> 106: 2165-2169                                                                                                                                    |
| <i>Bos taurus</i> | 3ABM | X-ray | 1.95 | dimer | missing | Aoyama, H., Muramoto, K., Shinzawa-Itoh, K., Hirata, K., Yamashita, E., Tsukihara, T., Ogura, T., Yoshikawa, S. (2009) A peroxide bridge between Fe and Cu ions in the O2 reduction site of fully oxidized cytochrome c oxidase could suppress the proton pump. <i>Proc.Natl.Acad.Sci.USA</i> 106: 2165-2169                                                                                                                                    |
| <i>Bos taurus</i> | 3AG1 | X-ray | 2.2  | dimer | missing | Muramoto, K., Ohta, K., Shinzawa-Itoh, K., Kanda, K., Taniguchi, M., Nabekura, H., Yamashita, E., Tsukihara, T., Yoshikawa, S. (2010) Bovine cytochrome c oxidase structures enable O2 reduction with minimization of reactive oxygens and provide a proton-pumping gate. <i>Proc.Natl.Acad.Sci.USA</i> 107: 7740-7745                                                                                                                          |
| <i>Bos taurus</i> | 3AG2 | X-ray | 1.8  | dimer | missing | Muramoto, K., Ohta, K., Shinzawa-Itoh, K., Kanda, K., Taniguchi, M., Nabekura, H., Yamashita, E., Tsukihara, T., Yoshikawa, S. (2010) Bovine cytochrome c oxidase structures enable O2 reduction with minimization of reactive oxygens and provide a proton-pumping gate. <i>Proc.Natl.Acad.Sci.USA</i> 107: 7740-7745                                                                                                                          |
| <i>Bos taurus</i> | 3AG3 | X-ray | 1.8  | dimer | missing | Muramoto, K., Ohta, K., Shinzawa-Itoh, K., Kanda, K., Taniguchi, M., Nabekura, H., Yamashita, E., Tsukihara, T., Yoshikawa, S. (2010) Bovine cytochrome c oxidase structures enable O2 reduction with minimization of reactive oxygens and provide a proton-pumping gate. <i>Proc.Natl.Acad.Sci.USA</i> 107: 7740-7745                                                                                                                          |
| <i>Bos taurus</i> | 3AG4 | X-ray | 2.05 | dimer | missing | Muramoto, K., Ohta, K., Shinzawa-Itoh, K., Kanda, K., Taniguchi, M., Nabekura, H., Yamashita, E., Tsukihara, T., Yoshikawa, S. (2010) Bovine cytochrome c oxidase structures enable O2 reduction with minimization of reactive oxygens and provide a proton-pumping gate. <i>Proc.Natl.Acad.Sci.USA</i> 107: 7740-7745                                                                                                                          |
| <i>Bos taurus</i> | 3ASN | X-ray | 3.0  | dimer | missing | Suga, M., Yano, N., Muramoto, K., Shinzawa-Itoh, K., Maeda, T., Yamashita, E., Tsukihara, T., Yoshikawa, S. Distinguishing between Cl- and O2(2-) as the bridging element between Fe3+ and Cu2+ in resting-oxidized cytochrome c oxidase. (2011) <i>Acta Crystallogr.,Sect.D</i> 67: 742-744                                                                                                                                                    |
| <i>Bos taurus</i> | 3ASO | X-ray | 2.3  | dimer | missing | Suga, M., Yano, N., Muramoto, K., Shinzawa-Itoh, K., Maeda, T., Yamashita, E., Tsukihara, T., Yoshikawa, S. Distinguishing between Cl- and O2(2-) as the bridging element between Fe3+ and Cu2+ in resting-oxidized cytochrome c oxidase. (2011) <i>Acta Crystallogr.,Sect.D</i> 67: 742-744                                                                                                                                                    |
| <i>Bos taurus</i> | 3WG7 | X-ray | 1.9  | dimer | missing | Hirata, K., Shinzawa-Itoh, K., Yano, N., Takemura, S., Kato, K., Hatanaka, M., Muramoto, K., Kawahara, T., Tsukihara, T., Yamashita, E., Tono, K., Ueno, G., Hikima, T., Murakami, H., Inubushi, Y., Yabashi, M., Ishikawa, T., Yamamoto, M., Ogura, T., Sugimoto, H., Shen, J.R., Yoshikawa, S., Ago, H. (2014) Determination of damage-free crystal structure of an X-ray-sensitive protein using an XFEL. <i>Nat.Methods</i> Jul;11(7):734-6 |
| <i>Bos taurus</i> | 3X2Q | X-ray | 2.0  | dimer | missing | Yano, N., Muramoto, K., Mochizuki, M., Shinzawa-Itoh, K., Yamashita, E., Yoshikawa, S., Tsukihara, T. (2015) X-ray structure of cyanide-bound bovine heart cytochrome c oxidase in the fully oxidized state at 2.0 Å resolution. <i>Acta Crystallogr.,Sect.F</i> 71: 726-730                                                                                                                                                                    |

|                   |      |                     |      |         |         |                                                                                                                                                                                                                                                                                                                                                                                                                                                                                                                                              |
|-------------------|------|---------------------|------|---------|---------|----------------------------------------------------------------------------------------------------------------------------------------------------------------------------------------------------------------------------------------------------------------------------------------------------------------------------------------------------------------------------------------------------------------------------------------------------------------------------------------------------------------------------------------------|
| <i>Bos taurus</i> | 5B1A | X-ray               | 1.5  | dimer   | missing | Yano, N., Muramoto, K., Shimada, A., Takemura, S., Baba, J., Fujisawa, H., Mochizuki, M., Shinzawa-Itoh, K., Yamashita, E., Tsukihara, T., Yoshikawa, S. (2016) The Mg <sup>2+</sup> -containing Water Cluster of Mammalian Cytochrome c Oxidase Collects Four Pumping Proton Equivalents in Each Catalytic Cycle. <i>J.Biol.Chem.</i> 291: 23882-23894                                                                                                                                                                                      |
| <i>Bos taurus</i> | 5B1B | X-ray               | 1.6  | dimer   | missing | Yano, N., Muramoto, K., Shimada, A., Takemura, S., Baba, J., Fujisawa, H., Mochizuki, M., Shinzawa-Itoh, K., Yamashita, E., Tsukihara, T., Yoshikawa, S. (2016) The Mg <sup>2+</sup> -containing Water Cluster of Mammalian Cytochrome c Oxidase Collects Four Pumping Proton Equivalents in Each Catalytic Cycle. <i>J.Biol.Chem.</i> 291: 23882-23894                                                                                                                                                                                      |
| <i>Bos taurus</i> | 5B3S | X-ray               | 1.68 | dimer   | missing | Shimada, A., Baba, J., Yamashita, E., Shinzawa-Ito, K., Yoshikawa, S., Tsukihara, T. Bovine heart cytochrome c oxidase in the carbon monoxide-bound mixed-valence state at 1.68 angstrom resolution. (50 K)                                                                                                                                                                                                                                                                                                                                  |
| <i>Bos taurus</i> | 5IY5 | X-ray               | 2.0  | dimer   | missing | Shimada, S., Shinzawa-Itoh, K., Baba, J., Aoe, S., Shimada, A., Yamashita, E., Kang, J., Tateno, M., Yoshikawa, S., Tsukihara, T. (2017) Complex structure of cytochrome c-cytochrome c oxidase reveals a novel protein-protein interaction mode <i>EMBO J.</i> 36: 291-300                                                                                                                                                                                                                                                                  |
| <i>Bos taurus</i> | 5W97 | X-ray               | 2.3  | dimer   | missing | Ishigami, I., Zatsepin, N.A., Hikita, M., Conrad, C.E., Nelson, G., Coe, J.D., Basu, S., Grant, T.D., Seaberg, M.H., Sierra, R.G., Hunter, M.S., Fromme, P., Fromme, R., Yeh, S.R., Rousseau, D.L. (2017) Crystal structure of CO-bound cytochrome c oxidase determined by serial femtosecond X-ray crystallography at room temperature. <i>Proc. Natl. Acad. Sci. U.S.A.</i> 114: 8011-8016                                                                                                                                                 |
| <i>Bos taurus</i> | 5WAU | X-ray               | 1.95 | dimer   | missing | Ishigami, I., Zatsepin, N.A., Hikita, M., Conrad, C.E., Nelson, G., Coe, J.D., Basu, S., Grant, T.D., Seaberg, M.H., Sierra, R.G., Hunter, M.S., Fromme, P., Fromme, R., Yeh, S.R., Rousseau, D.L. (2017) Crystal structure of CO-bound cytochrome c oxidase determined by serial femtosecond X-ray crystallography at room temperature. <i>Proc. Natl. Acad. Sci. U.S.A.</i> 114: 8011-8016                                                                                                                                                 |
| <i>Bos taurus</i> | 5X19 | X-ray               | 2.2  | dimer   | missing | Shimada, A., Kubo, M., Baba, S., Yamashita, K., Hirata, K., Ueno, G., Nomura, T., Kimura, T., Shinzawa-Itoh, K., Baba, J., Hatano, K., Eto, Y., Miyamoto, A., Murakami, H., Kumasaka, T., Owada, S., Tono, K., Yabashi, M., Yamaguchi, Y., Yanagisawa, S., Sakaguchi, M., Ogura, T., Komiya, R., Yan, J., Yamashita, E., Yamamoto, M., Ago, H., Yoshikawa, S., Tsukihara, T. (2017) A nanosecond time-resolved XFEL analysis of structural changes associated with CO release from cytochrome c oxidase. <i>Sci Adv</i> 3: e1603042-e1603042 |
| <i>Bos taurus</i> | 5X1B | X-ray               | 2.4  | dimer   | missing | Shimada, A., Kubo, M., Baba, S., Yamashita, K., Hirata, K., Ueno, G., Nomura, T., Kimura, T., Shinzawa-Itoh, K., Baba, J., Hatano, K., Eto, Y., Miyamoto, A., Murakami, H., Kumasaka, T., Owada, S., Tono, K., Yabashi, M., Yamaguchi, Y., Yanagisawa, S., Sakaguchi, M., Ogura, T., Komiya, R., Yan, J., Yamashita, E., Yamamoto, M., Ago, H., Yoshikawa, S., Tsukihara, T. (2017) A nanosecond time-resolved XFEL analysis of structural changes associated with CO release from cytochrome c oxidase. <i>Sci Adv</i> 3: e1603042-e1603042 |
| <i>Bos taurus</i> | 5X1F | X-ray               | 2.2  | dimer   | missing | Shimada, A., Kubo, M., Baba, S., Yamashita, K., Hirata, K., Ueno, G., Nomura, T., Kimura, T., Shinzawa-Itoh, K., Baba, J., Hatano, K., Eto, Y., Miyamoto, A., Murakami, H., Kumasaka, T., Owada, S., Tono, K., Yabashi, M., Yamaguchi, Y., Yanagisawa, S., Sakaguchi, M., Ogura, T., Komiya, R., Yan, J., Yamashita, E., Yamamoto, M., Ago, H., Yoshikawa, S., Tsukihara, T. (2017) A nanosecond time-resolved XFEL analysis of structural changes associated with CO release from cytochrome c oxidase. <i>Sci Adv</i> 3: e1603042-e1603042 |
| <i>Bos taurus</i> | 5XDQ | X-ray               | 1.77 | dimer   | missing | Luo, F.J., Shinzawa-Itoh, K., Hagimoto, N., Shimada, A., Shimada, S., Yamashita, E., Yoshikawa, S., Tsukihara, T. (2017) Structure of bovine cytochrome c oxidase crystallized at a neutral pH using a fluorinated detergent <i>Acta Crystallogr., Sect. F</i> 73: 416-422                                                                                                                                                                                                                                                                   |
| <i>Bos taurus</i> | 5LUF | electron microscopy | 9.1  | monomer | missing | Sousa, J.S., Mills, D.J., Vonck, J., Kuhlbrandt, W. (2016) Functional asymmetry and electron flow in the bovine respirasome. <i>Elife</i> 2016 Nov 10;5                                                                                                                                                                                                                                                                                                                                                                                      |
| <i>Sus scrofa</i> | 5GPN | electron microscopy | 5.4  | monomer | missing | Gu, J., Wu, M., Guo, R., Yan, K., Lei, J., Gao, N., Yang, M. (2016) The architecture of the mammalian respirasome. <i>Nature</i> 537: 639-64                                                                                                                                                                                                                                                                                                                                                                                                 |

|                     |      |                     |     |         |         |                                                                                                                                                   |
|---------------------|------|---------------------|-----|---------|---------|---------------------------------------------------------------------------------------------------------------------------------------------------|
| <i>Sus scrofa</i>   | 5GUP | electron microscopy | 4.0 | monomer | missing | Wu, M., Gu, J., Guo, R., Huang, Y., Yang, M. (2016) Structure of Mammalian Respiratory Supercomplex I1III2IV1 Cell 167: 1598-1609.e10             |
| <i>Ovis aries</i>   | 5J4Z | electron microscopy | 5.8 | monomer | missing | Letts, J.A., Fiedorczuk, K., Sazanov, L.A. (2016) The architecture of respiratory supercomplexes. Nature 537: 644-648                             |
| <i>Ovis aries</i>   | 5J7Y | electron microscopy | 6.7 | monomer | missing | Letts, J.A., Fiedorczuk, K., Sazanov, L.A. (2016) The architecture of respiratory supercomplexes. Nature 537: 644-648                             |
| <i>Homo sapiens</i> | 5XTH | electron microscopy | 3.9 | monomer | missing | Guo, R., Zong, S., Wu, M., Gu, J., Yang, M. (2017) Architecture of Human Mitochondrial Respiratory Megacomplex I2III2IV2. Cell 170: 1247-1257.e12 |

---
