# Supplementary material
Source: PubMed Central journal article supplement (PMC6170408)
Supplement: 41422_2018_71_MOESM7_ESM.pdf [file 41422_2018_71_MOESM7_ESM.pdf]

| <b>Complex IV</b>                          |        |
|--------------------------------------------|--------|
| <b>Reconstruction</b>                      |        |
| Accuracy of rotations (°)                  | 1.535  |
| Accuracy of translations (pixel)           | 1.476  |
| B-factor from post-processing              | -115.1 |
| <b>Validation</b>                          |        |
| Molprobity Score (overall score)           | 1.93   |
| Rotamer outliers (%)                       | 0.45   |
| EMRinger                                   | 3.31   |
| <b>Rmachandran (Real-space refinement)</b> |        |
| Favored (%)                                | 95.45  |
| Allowed (%)                                | 4.5    |
| Outliers (%)                               | 0.05   |
| <b>R.m.s Deviations</b>                    |        |
| Bonds length (Å)                           | 0.008  |
| Bonds angles (Å)                           | 0.921  |

**Table S2. Model refinement statistics and validation scores**
