# Supplementary material
Source: PubMed Central journal article supplement (PMC6170408)
Supplement: 41422_2018_71_MOESM8_ESM.pdf [file 41422_2018_71_MOESM8_ESM.pdf]

| Subunit | Chromosome   | Total residues | Mature protein | Assigned residues | Sequence identity ( <i>B. taurus</i> ) |
|---------|--------------|----------------|----------------|-------------------|----------------------------------------|
| MT-CO1  | mitochondria | 513aa          | 1-513aa        | 1-513aa           | 91.05%                                 |
| MT-CO2  | mitochondria | 227aa          | 1-227aa        | 1-227aa           | 72.69%                                 |
| MT-CO3  | mitochondria | 261aa          | 1-261aa        | 2-261aa           | 87.74%                                 |
| COX4I1  | 16q24.1      | 169aa          | 23-169aa       | 26-169aa          | 82.84%                                 |
| COX5A   | 15q24.2      | 150aa          | 42-150aa       | 42-150aa          | 86.84%                                 |
| COX5B   | 2q11.2       | 129aa          | 32-129aa       | 32-129aa          | 82.95%                                 |
| COX6A1  | 12q24.31     | 109aa          | 25-109aa       | 34-109aa          | 84.40%                                 |
| COX6B1  | 19q13.12     | 86aa           | 2-86aa         | 5-86aa            | 84.88%                                 |
| COX6C   | 8q22.2       | 75aa           | 1-75aa         | 3-75aa            | 73.33%                                 |
| COX7A2  | 6q14.1       | 83aa           | 24-83aa        | 25-80aa           | 84.34%                                 |
| COX7B   | Xq21.1       | 80aa           | 25-80aa        | 30-78aa           | 78.75%                                 |
| COX7C   | 5q14.3       | 63aa           | 17-63aa        | 17-63aa           | 84.13%                                 |
| COX8A   | 11q13.1      | 69aa           | 26-69aa        | 26-69aa           | 72.46%                                 |
| NDUFA4  | 7p21.3       | 81aa           | 1-81aa         | 3-81aa            | 87.80%                                 |

**Table S3. All the subunits of *homo sapiens* complex IV**
